# Supplementary material for: A catalytic amplification platform based on Fe2O3 nanoparticles decorated graphene nanocomposites for highly sensitive detection of rutin
Source: Royal Society of Chemistry journal article supplement (doi:10.1039/d4na00583j), 2024-01-01
Supplement: d4na00583j1.pdf [file d4na00583j1.pdf]

## Supplementary Information

### **Catalytic amplification platform based on Fe<sub>2</sub>O<sub>3</sub> nanoparticles decorated graphene nanocomposite for highly sensitive detection of rutin**

Zhuzhen Chen<sup>a</sup>, Tingting Zhang<sup>b</sup>, Xue Zhang<sup>a</sup>, Wangxing Cheng<sup>a,\*</sup>, Linwei Chen<sup>a,\*</sup>,  
Nannan Lu<sup>a,\*</sup>

<sup>a</sup> *College of Pharmacy, Anhui University of Chinese Medicine, Hefei 230013, PR China*

<sup>b</sup> *Qingdao Cancer Institute, Qingdao University, Qingdao 266071, PR China*

\* Correspondences author.

*E-mail address: wxcheng@ahtcm.edu.cn; chenlw@ahtcm.edu.cn; lunn@ahtcm.edu.cn*

## 1. Instruments and reagents

FePc, melamine, rutin, disodium hydrogen phosphate ( $\text{Na}_2\text{HPO}_4$ ), and potassium dihydrogen phosphate ( $\text{KH}_2\text{PO}_4$ ) were acquired from Macklin Industrial Co., Ltd. (Shanghai, China). Other chemical reagents of analytical grade were obtained from Sinopharm Chemical Reagent Co., LTD. (Shanghai, China). Rutin tablets with the label amount of 20.0 mg/tablet were obtained from Ningbo Dahongying Pharmaceutical Co., LTD. (Ningbo, China). Doubly distilled water was utilized in this experiment. A 0.1 M phosphate buffer solution (PBS) was made by mixing the solutions of  $\text{KH}_2\text{PO}_4$  and  $\text{Na}_2\text{HPO}_4$  and used as the supporting electrolyte.

Scanning electron microscopy (SEM) measurements and energy-dispersive X-ray (EDX) spectrometry were detected on GeminiSEM 360 scanning electron microscope. Transmission electron microscopy (TEM) was taken from a JEM-1200EX microscope. Powder X-ray diffraction (XRD) analysis was analyzed on a Bruker D8 Advance X-ray diffractometer. X-ray photoelectron spectroscopy (XPS) was explored by Thermo ESCALAB 250XI. Electrochemical experiments were performed on a Shanghai Chenhua CHI 660E electrochemical workstation. The electrochemical cell included a three-electrode system containing a glassy carbon electrode (GCE, 3 mm in diameter), a platinum (Pt) wire, and a saturated calomel electrode (SCE).

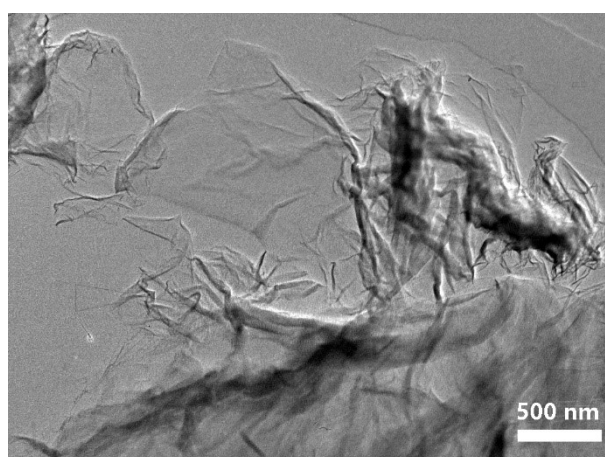

**Fig. S1.** TEM image of N-rGO.

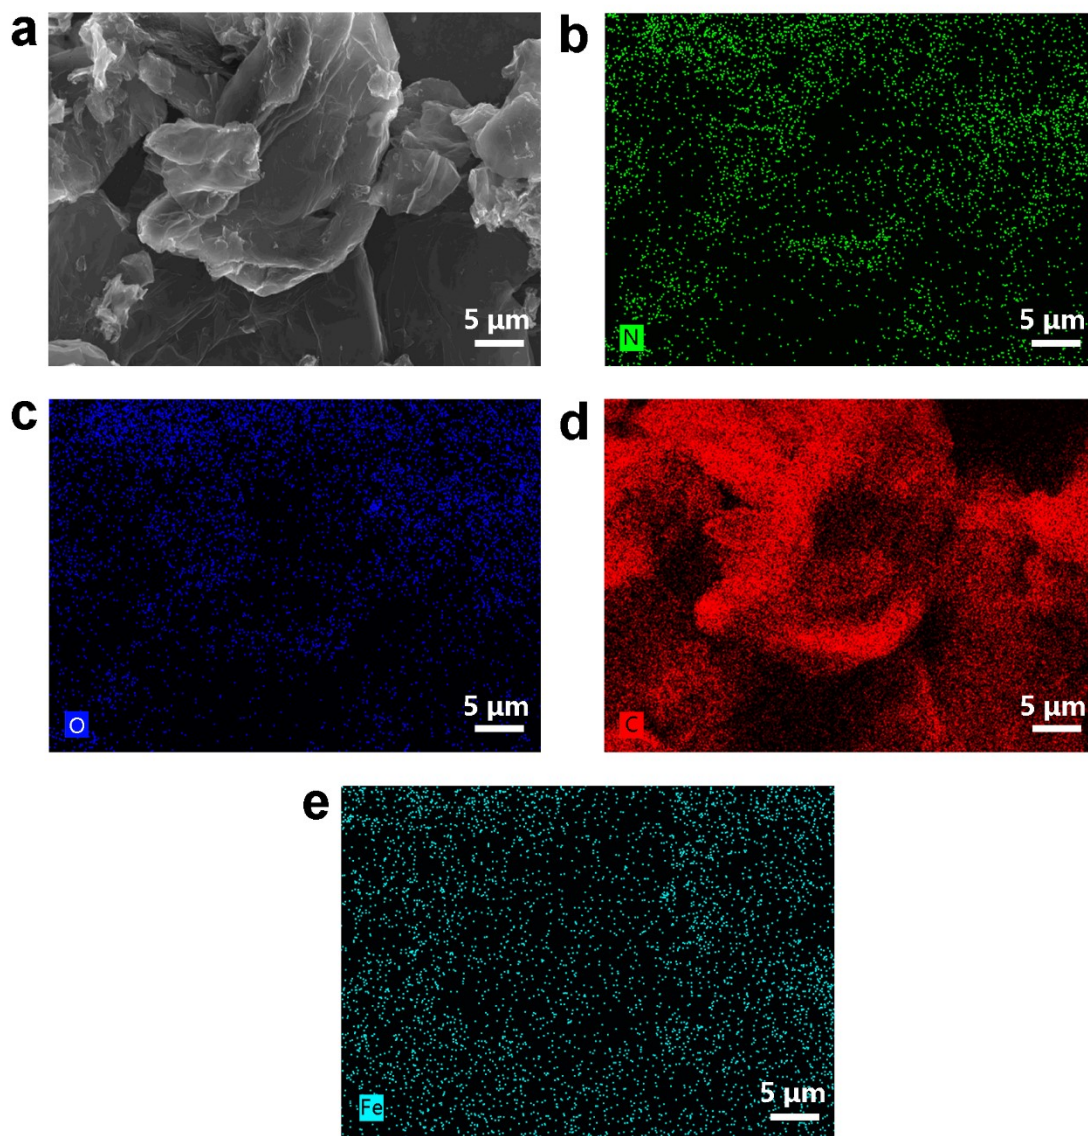

**Fig. S2.** (a) SEM of Fe<sub>2</sub>O<sub>3</sub>/N-rGO, (b) N, (c) O, (d) C, and (e) Fe element mapping images of Fe<sub>2</sub>O<sub>3</sub>/N-rGO.

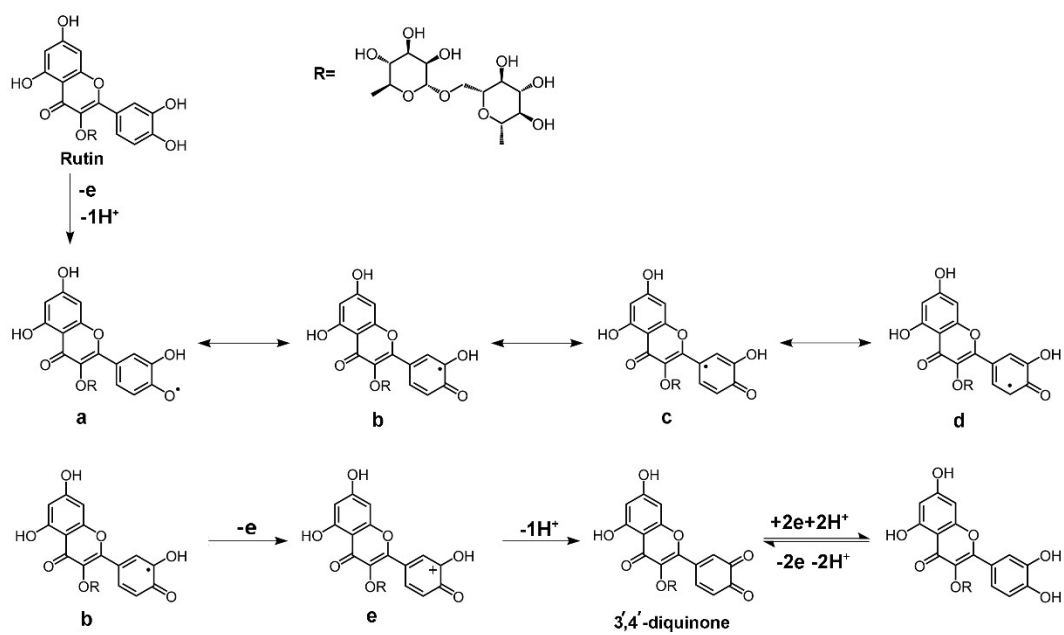

**Scheme S1.** Electrochemical oxidation mechanism of rutin.

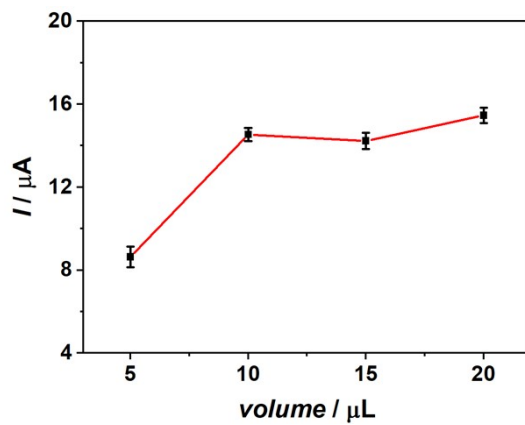

**Fig. S3.** Plot of oxidation peak current of rutin versus volume of the dropped suspension.

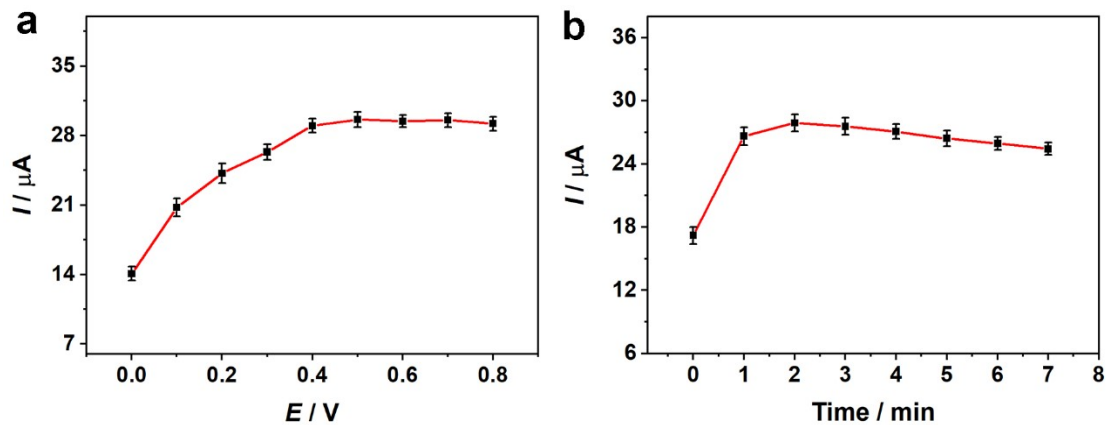

**Fig. S4.** (a) The oxidation currents of 100  $\mu\text{M}$  rutin on  $\text{Fe}_2\text{O}_3/\text{N-rGO}/\text{GCE}$  with different accumulation potential at the accumulation time of 30 s. (b) The oxidation currents of 100  $\mu\text{M}$  rutin on  $\text{Fe}_2\text{O}_3/\text{N-rGO}/\text{GCE}$  with different accumulation time at the accumulation potential of 0.4 V.

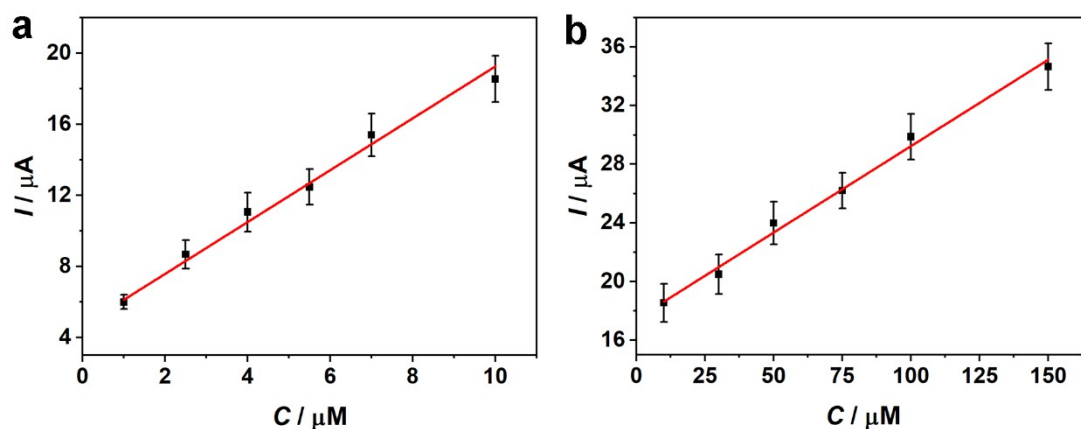

**Fig. S5.** (a) The linear plot of current versus concentration of rutin in the range of 1-10  $\mu\text{M}$ . (b) The linear plot of current versus concentration of rutin in the range of 10-150  $\mu\text{M}$ .

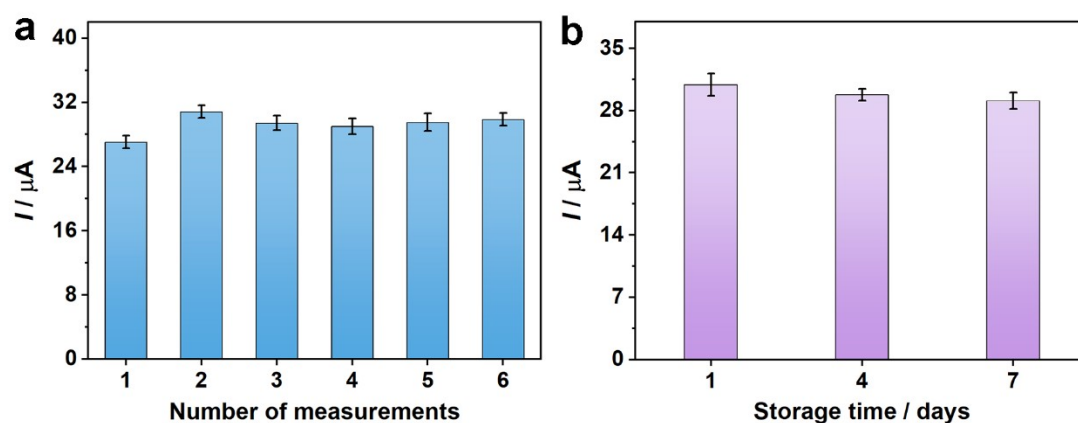

**Fig. S6.** (a) Repeatability of  $\text{Fe}_2\text{O}_3/\text{N-rGO}/\text{GCE}$  in six detections of 100  $\mu\text{M}$  rutin. (b) Stability of  $\text{Fe}_2\text{O}_3/\text{N-rGO}/\text{GCE}$  for 7 days.

**Table S1.** Weight percentage of individual atoms in  $\text{Fe}_2\text{O}_3/\text{N-rGO}$  as determined by EDS analysis.

| Elements | C (wt. %) | N (wt. %) | Fe (wt. %) | O (wt. %) |
|----------|-----------|-----------|------------|-----------|
| Content  | 75.01     | 14.34     | 1.64       | 9.01      |

**Table S2.** Result of element content of  $\text{Fe}_2\text{O}_3/\text{N-rGO}$  detected by XPS.

| Elements | C (at. %) | N (at. %) | Fe (at. %) | O (at. %) |
|----------|-----------|-----------|------------|-----------|
| Content  | 78.96     | 8.69      | 1.9        | 10.45     |

**Table S3.** Determination of rutin with commercial tablet samples (n=3).

| Sample       | Added<br>( $\mu\text{M}$ ) | Fe <sub>2</sub> O <sub>3</sub> /N-<br>rGO/GCE |                 |         | Spectrum<br>method      |                 |         |
|--------------|----------------------------|-----------------------------------------------|-----------------|---------|-------------------------|-----------------|---------|
|              |                            | Found ( $\mu\text{M}$ )                       | Recovery<br>(%) | RSD (%) | Found ( $\mu\text{M}$ ) | Recovery<br>(%) | RSD (%) |
| Rutin tablet | -                          | 61.5                                          | -               | -       | 61.1                    | -               | -       |
|              | 10.0                       | 71.8                                          | 103.0           | 3.98    | 70.6                    | 95.0            | 3.40    |
|              | 20.0                       | 82.8                                          | 106.5           | 2.09    | 81.4                    | 101.5           | 2.23    |
|              | 30.0                       | 89.5                                          | 93.3            | 3.14    | 90.5                    | 98.0            | 4.02    |
